# Supplementary material
Source: PubMed Central journal article supplement (PMC4785033)
Supplement: NIHMS756300-supplement.pdf [file NIHMS756300-supplement.pdf]

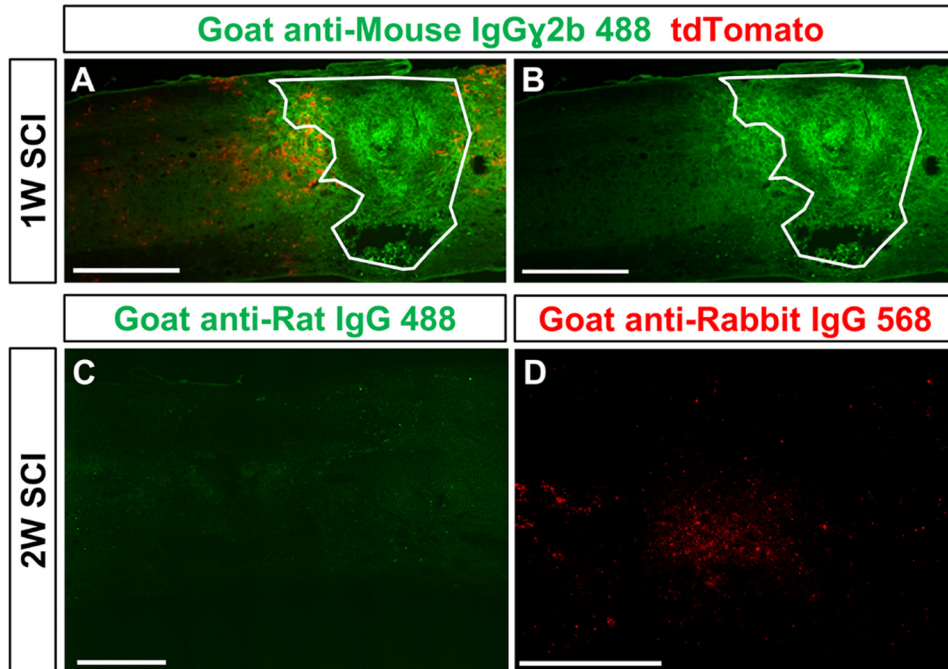

**Supplementary Figure 1. Non-specific staining from secondary antibody used for immunohistochemistry.** Since CC1 is an antibody made in mouse, no primary controls are shown in (A-B) to show that non-specific staining from the anti-mouse IgG $\gamma$ 2b secondary antibody (green) does not colocalize with tdTomato (red) and is limited to the lesion site (outlined by solid line) and adjacent region. Thus, the 0-250  $\mu$ m region was excluded from analyses. Secondary antibody controls for Goat anti-Rat IgG 488 (C), Goat anti-Rabbit 568 (D) are also shown. Scale bar=500  $\mu$ m.

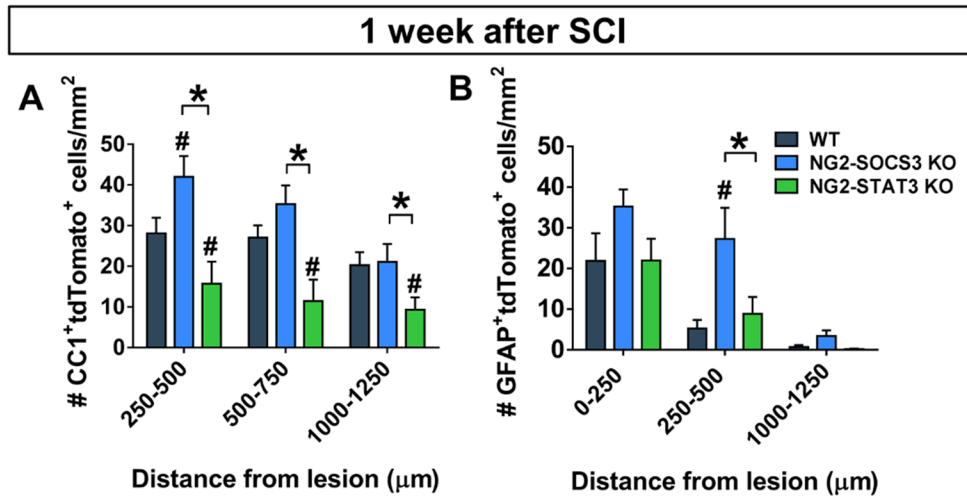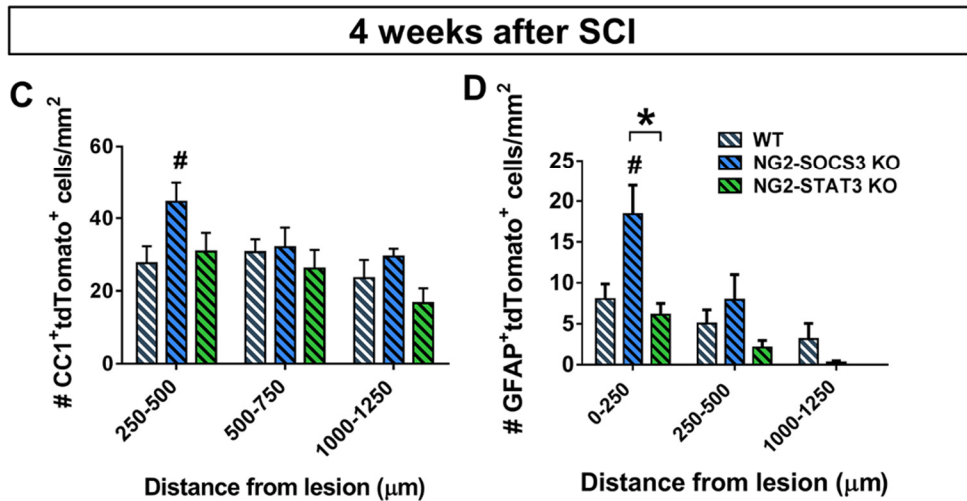

**Supplementary Figure 2. Densities of NG2-derived oligodendrocytes and astrocytes after SCI.** At 1 week after SCI, the density of tdTomato<sup>+</sup> cells that differentiated into CC1<sup>+</sup> mature oligodendrocytes (**A**) was significantly increased at 250-500 μm from the lesion in the NG2-SOCS3 KO mouse, and was significantly decreased at all regions analyzed in the NG2-STAT3 KO mouse compared to WT mice. At 1 week (**B**) and 4 weeks (**D**) after SCI, the density of tdTomato<sup>+</sup> cells that differentiated into GFAP<sup>+</sup> astrocytes was significantly increased. At 4 weeks after SCI, compared to the WT mouse, the density of tdTomato<sup>+</sup> cells that differentiated into mature oligodendrocytes (**C**) was significantly increased at the 250-500 μm from the lesion in the NG2-SOCS3 KO mouse. n=5-7 animals. #p<0.05 compared to WT. \*p<0.05 comparing bars enclosed in brackets. Two-way ANOVA with repeated measures and Tukey's multiple comparisons *post hoc* test.

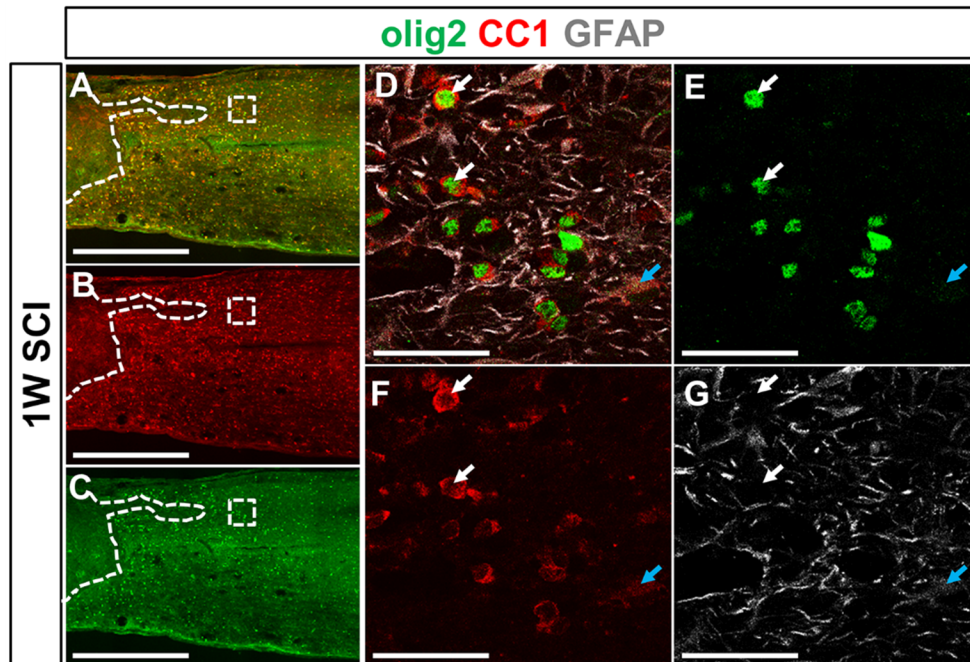

**Supplementary Figure 3. Olig2 expression in CC1<sup>+</sup> cells.** The olig2<sup>+</sup> (green) antibody labels the nuclei of CC1<sup>+</sup> (red) oligodendrocytes included in our analysis. White arrows represent examples of CC1<sup>+</sup> cells with olig2<sup>+</sup> nuclei. The majority of CC1 staining colocalized with olig2 (A-C) after SCI, however, occasional colocalization with GFAP was observed (blue arrows, D-G). These cells displayed faint CC1 staining located in cell processes.
